# Supplementary material
Source: PubMed Central journal article supplement (PMC3406877)
Supplement: 1201551109_pnas.1201551109_SI.pdf [file 1201551109_pnas.1201551109_SI.pdf]

# Supporting Information

Pheneey et al. 10.1073/pnas.1201551109

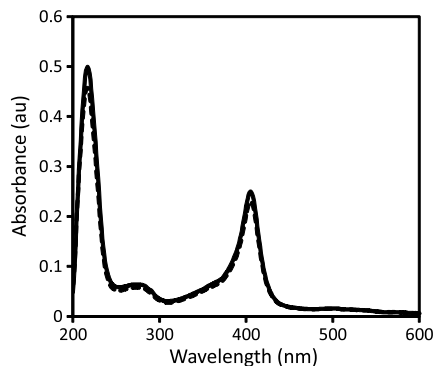

**Fig. S1.** Absorbance spectrum of hemoglobin (5  $\mu$ M) in phosphate buffer (5 mM phosphate, 5 mM NaCl, 40 mM MgCl<sub>2</sub>, 5 mM spermidine, and pH 7) before (solid) and after (dotted) electrocatalysis with MB-DNA.

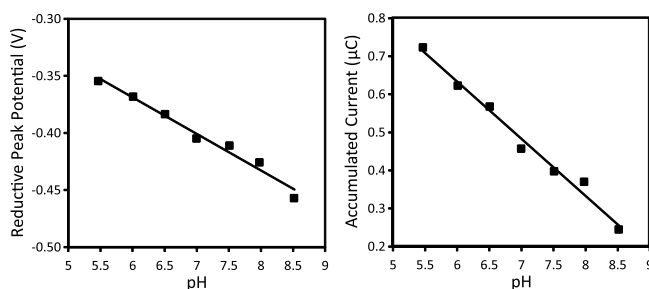

**Fig. S2.** *Left:* The MB-DNA peak reduction potential as a function of pH, ranging from 5.5 to 8.5 in the absence of hemoglobin measured from the cyclic voltammetry data (scan rate = 100 mV/s). *Right:* The accumulated current for electrocatalytically amplified MB-DNA in phosphate buffer (5 mM phosphate, 5 mM NaCl, 40 mM MgCl<sub>2</sub>, and 5 mM spermidine) as a function of pH, ranging from 5.5 to 8.5, is presented. The accumulated current was determined from chronocoulometry ( $V = -450$  mV for 10 s) in the presence of 25  $\mu$ M Hemoglobin.

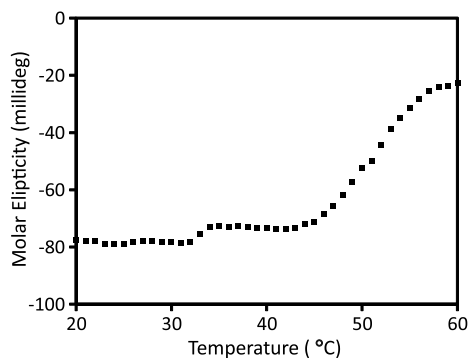

**Fig. S3.** Denaturation curve of hemoglobin (1  $\mu$ M) measured by circular dichroism in phosphate buffer (5 mM phosphate, 5 mM NaCl, 40 mM MgCl<sub>2</sub>, 5 mM spermidine, and pH 7). The molar ellipticity was measured at 225 nm as the temperature was varied from 20  $^{\circ}$ C to 60  $^{\circ}$ C. An initial transition can be observed from 32–35  $^{\circ}$ C and a larger transition at 45–56  $^{\circ}$ C corresponding to the denaturation of the alpha helices.
